# Supplementary material
Source: Research Square preprint supplement (doi:10.21203/rs.3.rs-9274000/v1)
Supplement: Supplementary file 1 [file aa32c306f84f88e6d549a442.docx]

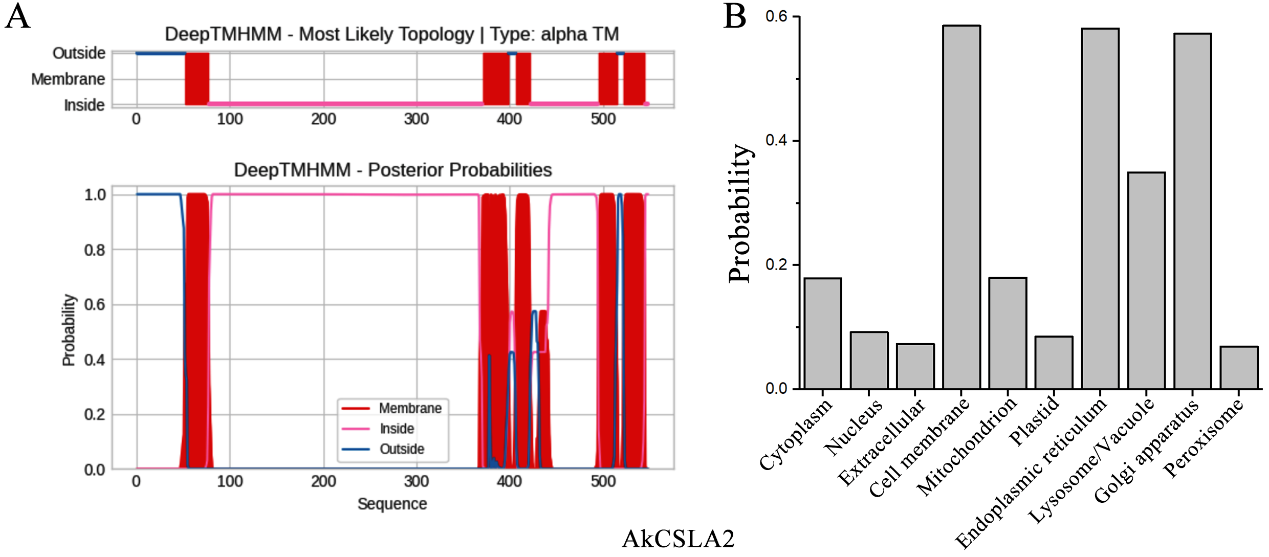


**Fig S1** ***In silico* prediction of AkCSLA2 protein transmembrane domain and subcellular localization.** **A** *In silico* prediction of AkCSLA2 protein transmembrane domain. Analysis was performed using DeepTMHMM-1.0 tool (https://services.healthtech.dtu.dk/services/DeepTMHMM-1.0/). **B** *In silico* prediction of AkCSLA2 protein subcellular localization. Analysis was performed using DeepLoc-1.0 tool (https://services.healthtech.dtu.dk/services/DeepLoc-1.0/).


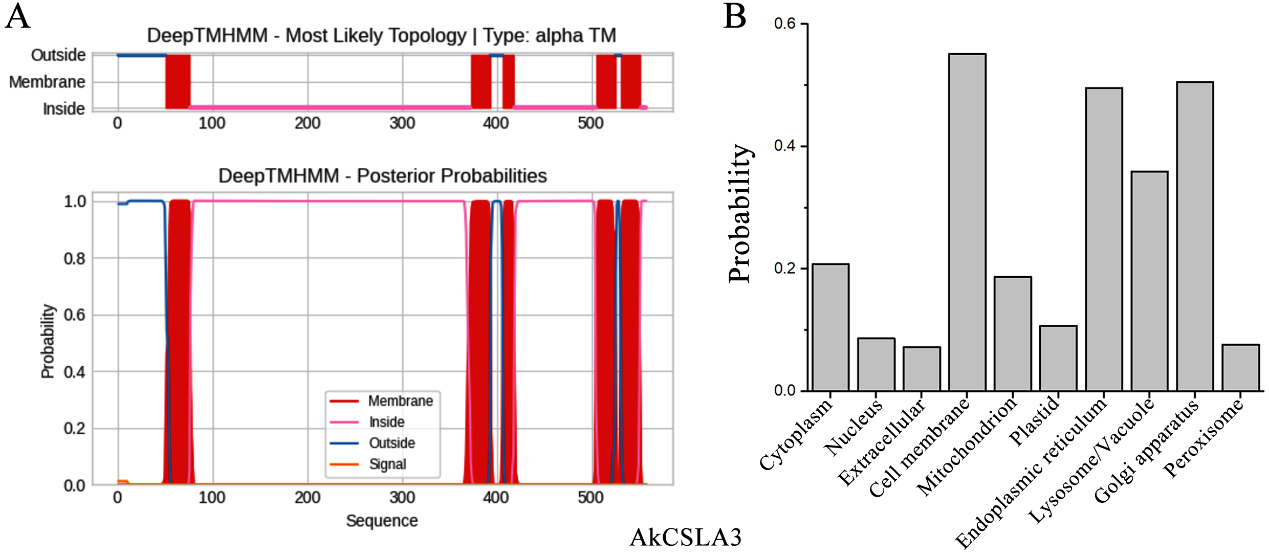


**Fig S2 *In silico* prediction of AkCSLA3 protein transmembrane domain and subcellular localization.** **A** *In silico* prediction of AkCSLA3 protein transmembrane domain. Analysis was performed using DeepTMHMM-1.0 tool (https://services.healthtech.dtu.dk/services/DeepTMHMM-1.0/). **B** *In silico* prediction of AkCSLA3 protein subcellular localization. Analysis was performed using DeepLoc-1.0 tool (https://services.healthtech.dtu.dk/services/DeepLoc-1.0/).


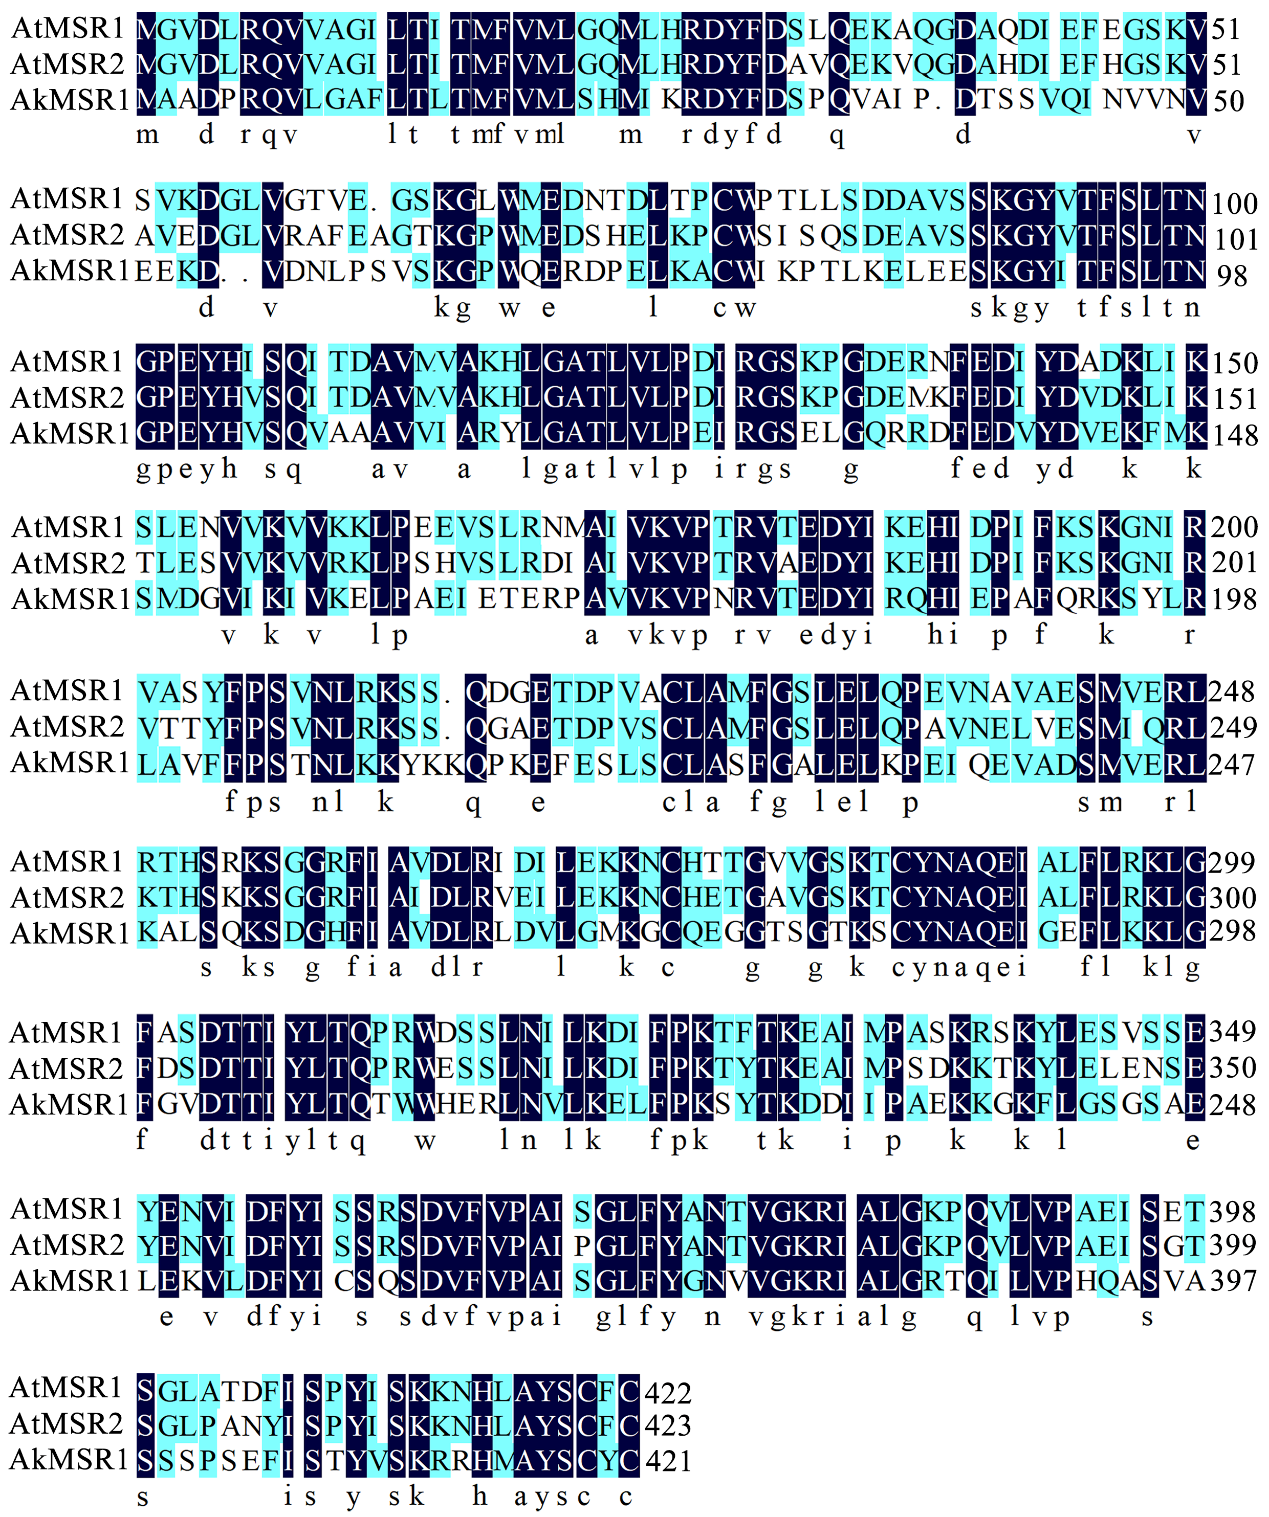
­­

**Fig S3 Multiple sequence comparison of MSR protein sequences of *A. Konjac* and *Arabidopsis.***


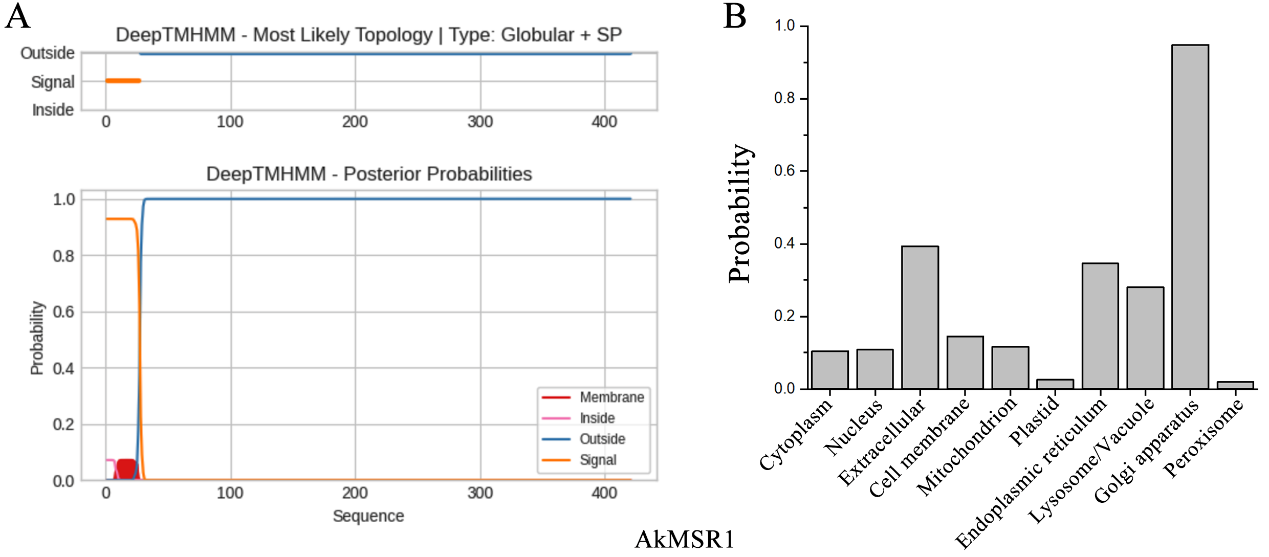
 **Fig S4 *In silico* prediction of** **AkMSR1 protein transmembrane domain and subcellular localization.** **A** *In silico* prediction of AkMSR1 protein transmembrane domain. Analysis was performed using DeepTMHMM-1.0 tool (https://services.healthtech.dtu.dk/services/DeepTMHMM-1.0/). **B** *In silico* prediction of AkMSR1 protein subcellular localization. Analysis was performed using DeepLoc-1.0 tool (https://services.healthtech.dtu.dk/services/DeepLoc-1.0/).


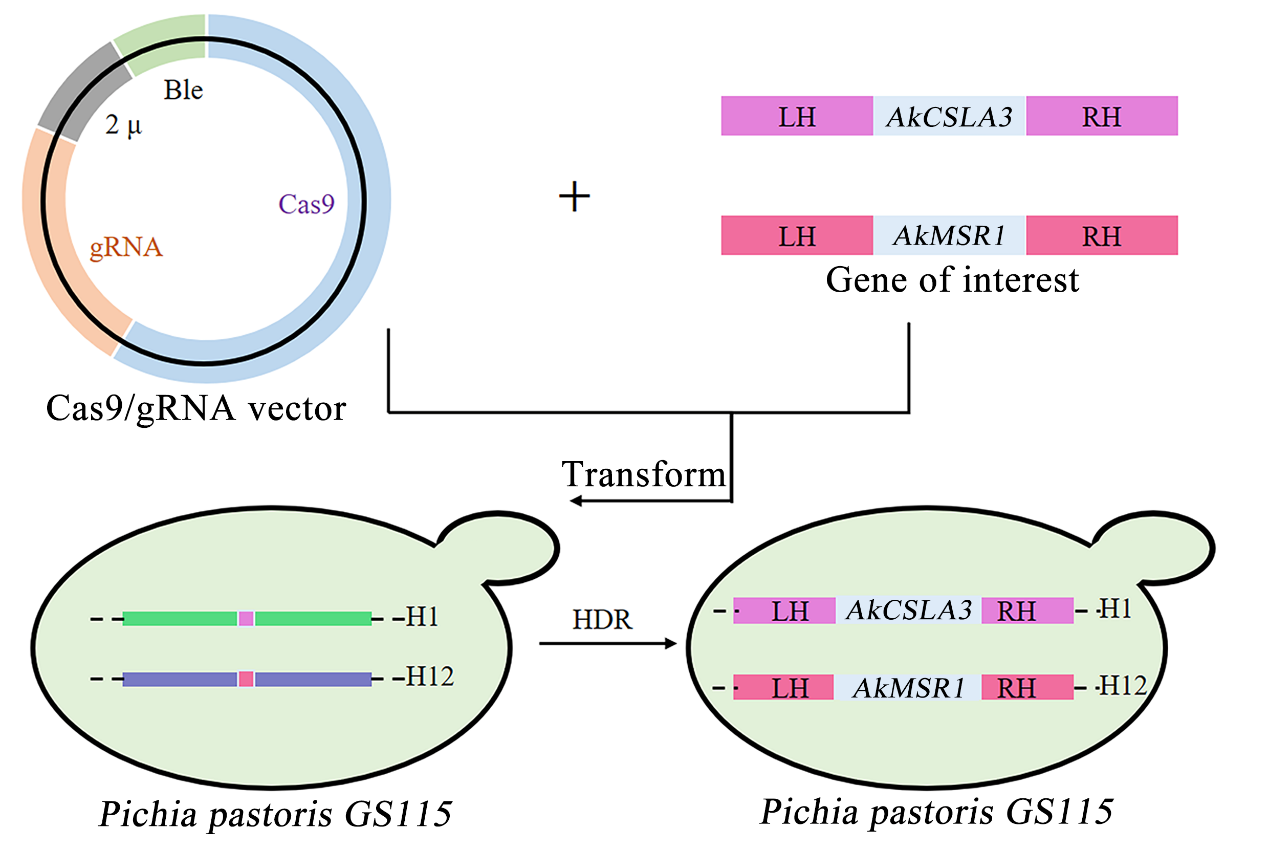


**Fig S5** **Schematic diagram of CRISPR-Cas9-mediated genomic integration of AkMSR1 and AkCSLA3 into Pichia pastoris GS115.** Schematic overview of the Cas9-CRISPR system used for the genomic integration of the AkMSR1 and AkCSLA3 in the GS115 strain of P. pastoris. The vector harbors a Cas9 cassette and a gRNA cassette specific to the synthetic gRNA target integrated at the defined CRISPR target loci. The gene of interest was flanked by ~500 bp-long left homology (LH) and right homology (RH) arms, which served as templates for integration at the respective intended CRISPR sites. The linearized donor facilitates the simultaneous targeting of the desired loci with a single gRNA molecule. This leads to the introduction of double-strand breaks (DSBs) at each locus and subsequent genomic integration of the two donor fragments via homology-directed repair (HDR).

**Original images of Figure 4B**

**
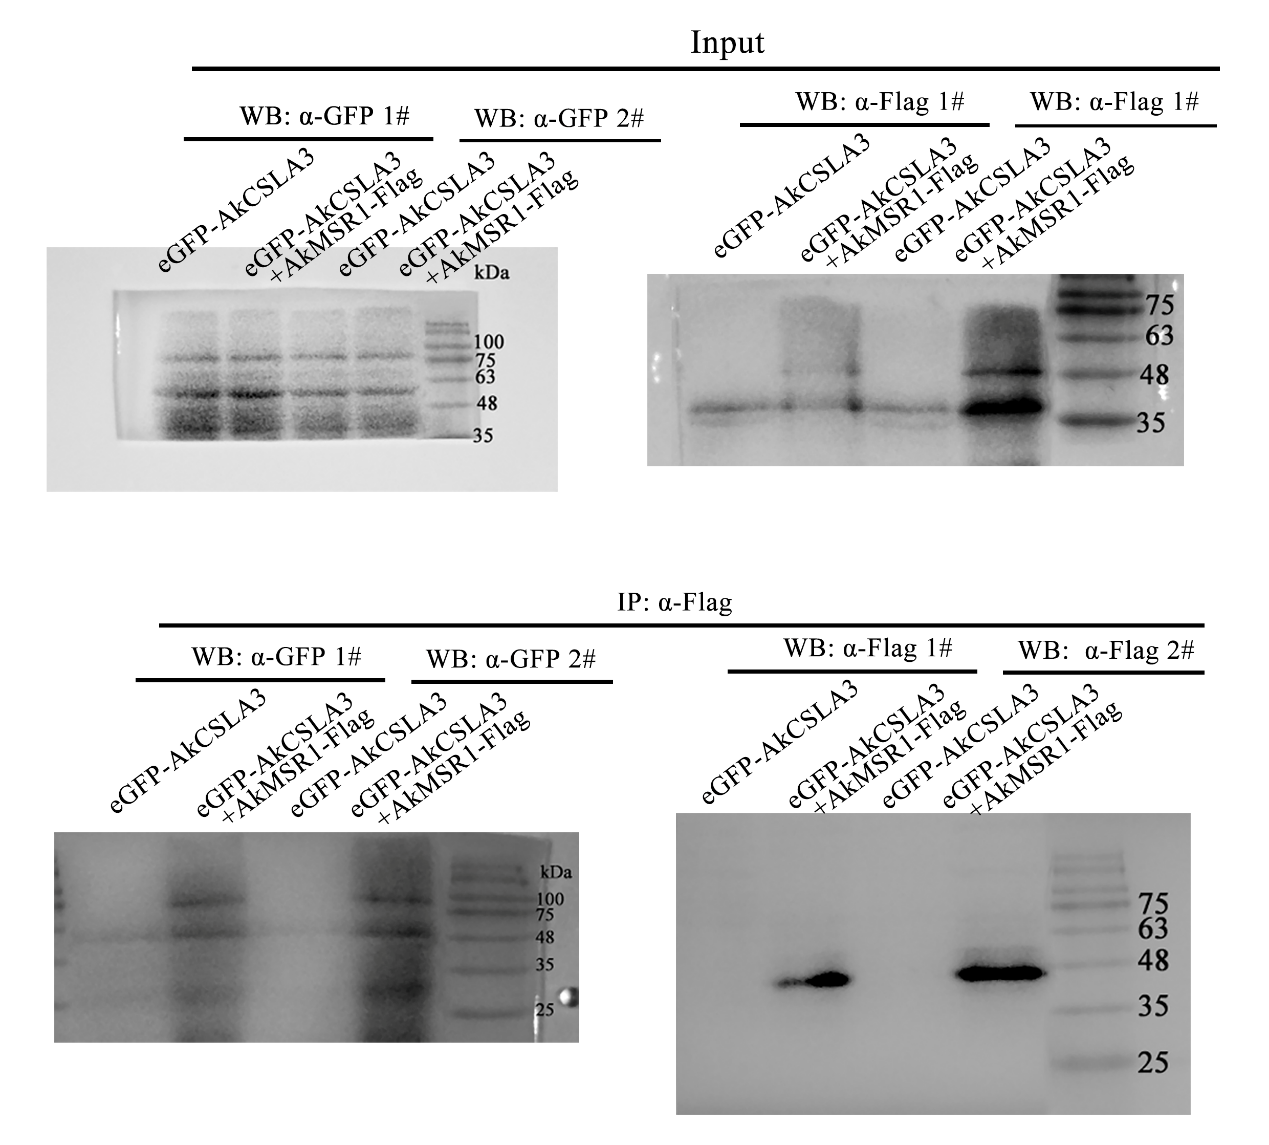
**

**4B** The interactions between AkCSLA3 and AkMSR1 in the foliar epidermal cells of *N*. *benthamiana* were determined by Co-IP assays. The eGFP-AkCSLA3 construct was transiently co-expressed with AkMSR1-Flag in the epidermal cells of *N*. *benthamiana* leaves. Plants transiently expressing eGFP-AkCSLA3 alone were used as the negative control. Proteins were extracted from the infiltrated leaves and analyzed using anti-FLAG and anti-GFP antibodies. The immunoprecipitated (IP) AkMSR1-Flag proteins were subsequently probed with an anti-GFP antibody for detecting the Co-IP of eGFP-AkCSLA3.
